# Supplementary material for: New aerobic oxidation of benzylic compounds: efficient catalysis by N-hydroxy-3,4,5,6-tetraphenylphthalimide (NHTPPI)/CuCl under mild conditions and low catalyst loadingElectronic supplementary information (ESI) available: experimental details. See http://www.rsc.org/suppdata/cc/b4/b403004d/
Source: Royal Society of Chemistry journal article supplement (doi:10.1039/b403004d), 2004-01-01
Supplement: b403004d.doc [file b403004d.doc]

**Suplementary Information**

**Procedure for the synthesis of NHTPPI:**

Tetraphenylphtalic anhydride (2.03 g, 4.5 mmol) and hydroxylamine hydrochloride (0.35 g, 5 mmol) were dissolved in anhydrous pyridine (20 mL). After stirring at room temperature for 2 hours, the reaction mixture was heated at 95 °C for 4 h. Pyridine was next evaporated at reduced pressure. Hydrochloric acid (2 M) was added to the crude reaction mixture until it becomes acidic (pH 2-3). The yellow precipitate was filtered, washed with water and dried under vacuum. Recristallisation from ethanol gave pure NHTPPI (1.51 g) in 72% yield.

Melting point 295-296.5 °C; 1H NMR (CDCl3) δ 7.19-7.07 (m, 10H), 6.90-6.87 (m, 6H), 6.74-6.69 (m, 4H), 1.8 (bs, 1H); 13C NMR (CDCl3) δ 163.4, 147.9, 139.5, 137.8, 135.1, 130.6, 129.8, 127.3, 127.2, 126.9, 126.3, 125.1; IR (KBr): 3255, 3061, 1777, 1731, 1444, 1092 cm-1; MS (DCI, NH3 + isobutane) m/z = 525, 508, 485, 469, 452.

Decay of 10b radical in acetonitrile at 35°C. [10b]0 = 0.5 mmol L-1. *k*d = 0.162 L mol-1 s-1 was obtained from second-order fitting. t1/2 = 205 min.

Decay of PINO in acetonitrile at 35°C. [10b]0 = 0.5 mmol L-1. *k*d = 0.162 L mol-1 s-1 was obtained from second-order fitting. t1/2 = 46 min.
